# Supplementary material for: (p)ppGpp-mediated stress response induced by defects in outer membrane biogenesis and ATP production promotes survival in Escherichia coli
Source: PubMed Central journal article supplement (PMC6393671; doi:10.1038/s41598-019-39371-3), 2019-02-27
Supplement: 41598_2019_39371_MOESM1_ESM.pdf [file 41598_2019_39371_MOESM1_ESM.pdf]

## **Supplementary information**

### **(p)ppGpp-mediated stress response induced by defects in outer membrane biogenesis and ATP production promotes survival in *Escherichia coli***

Mohammad Roghanian<sup>1</sup>, Szabolcs Semsey<sup>1</sup>, Anders Løbner-Olesen<sup>1</sup> & Farshid Jalalvand<sup>1\*</sup>

<sup>1</sup>Centre for Bacterial Stress Response and Persistence, Department of Biology, University of Copenhagen, Ole Maaløes Vej 5, DK-2200 Copenhagen, Denmark

\*Corresponding author: Farshid Jalalvand, PhD, farshid.jalalvand@bio.ku.dk

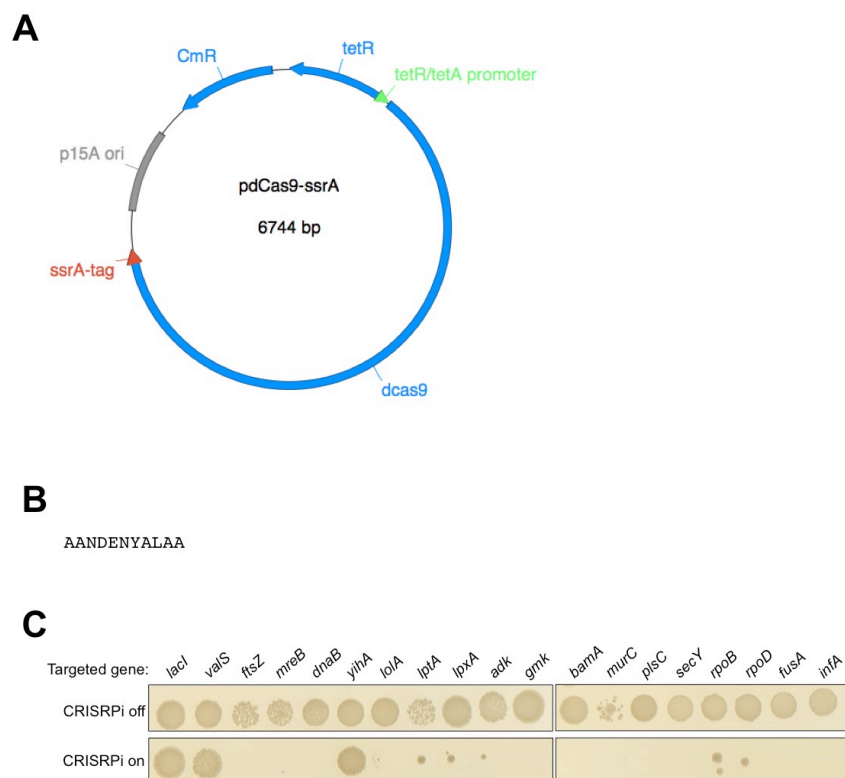

**Figure S1. Fusion of *ssrA* degradation-tag to *dcas9*.** (A) Schematic plasmid map of pdCas9-ssrA. (B) The amino acid sequence of the *ssrA* degradation-tag fused to dCas9. (C) Viability of *E. coli* MG1655 containing pdCas9-ssrA and sgRNA against the indicated genes. Overnight cultures were diluted 1000x and 3  $\mu$ l spotted on *dcas9-ssrA* non-inducing (CRISPRi off) and inducing (CRISPRi on) solid LB media.

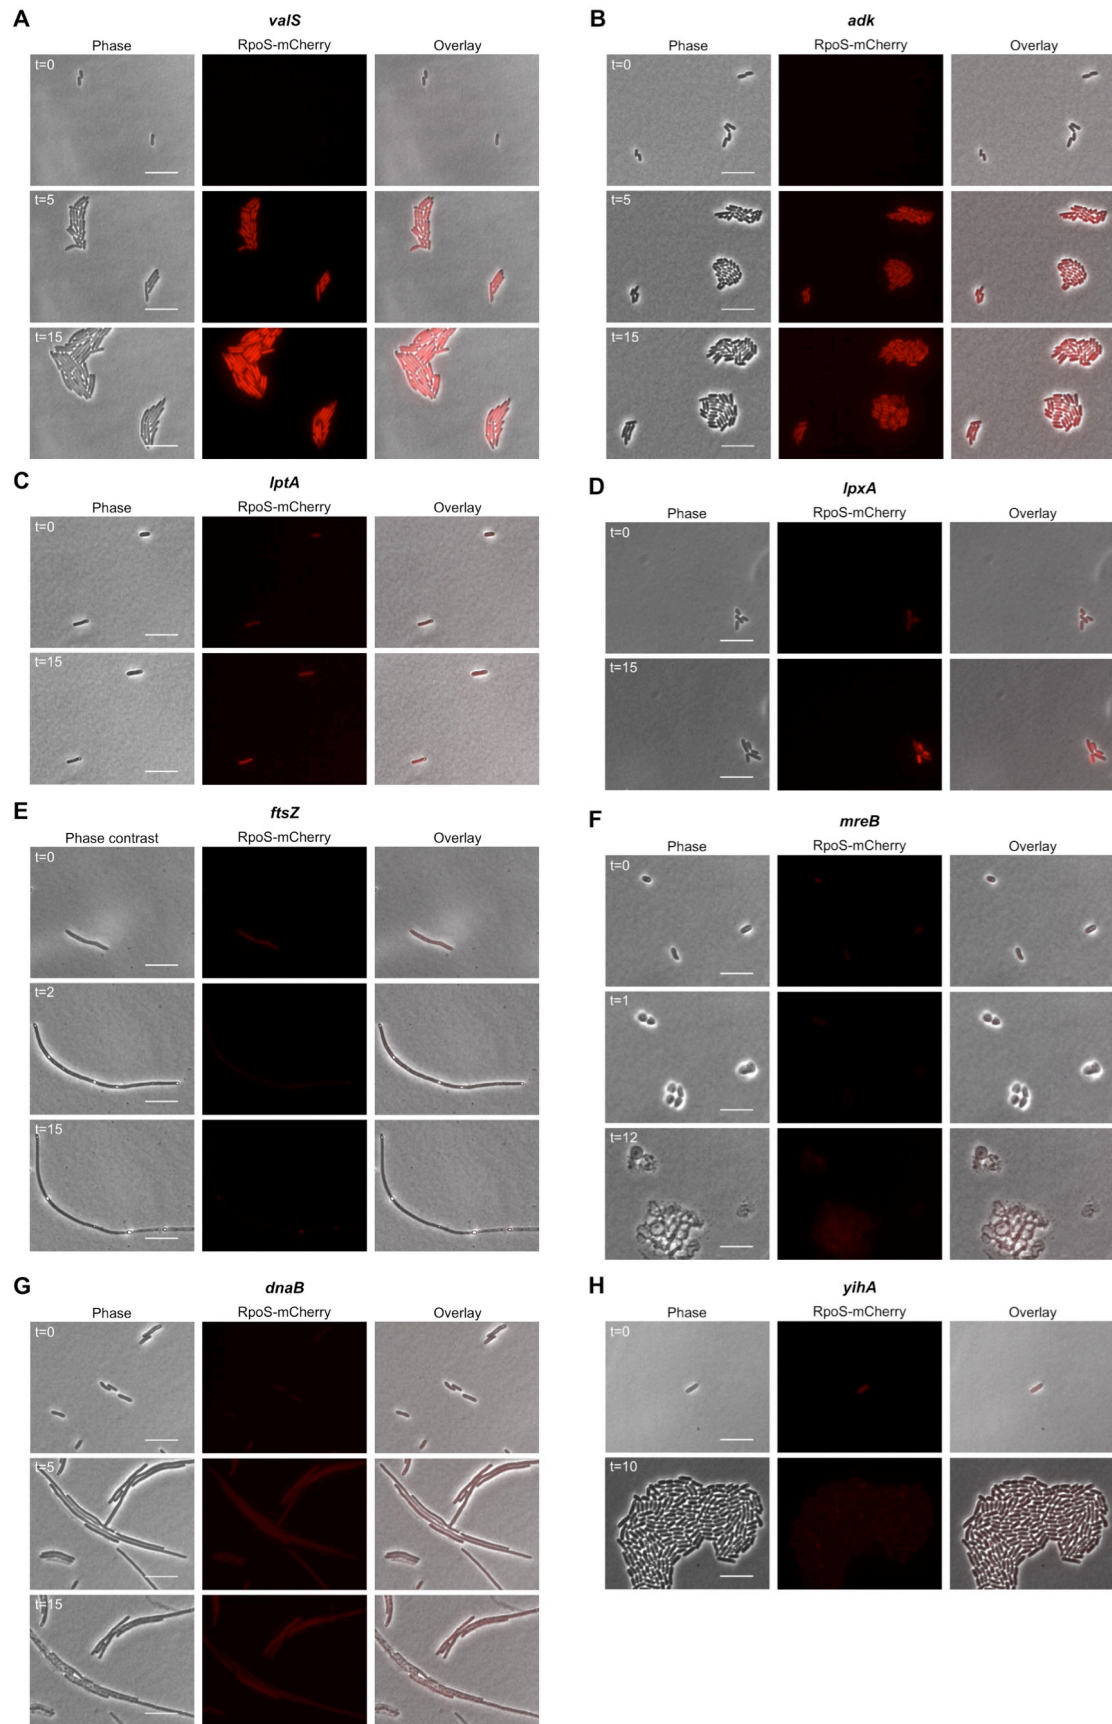

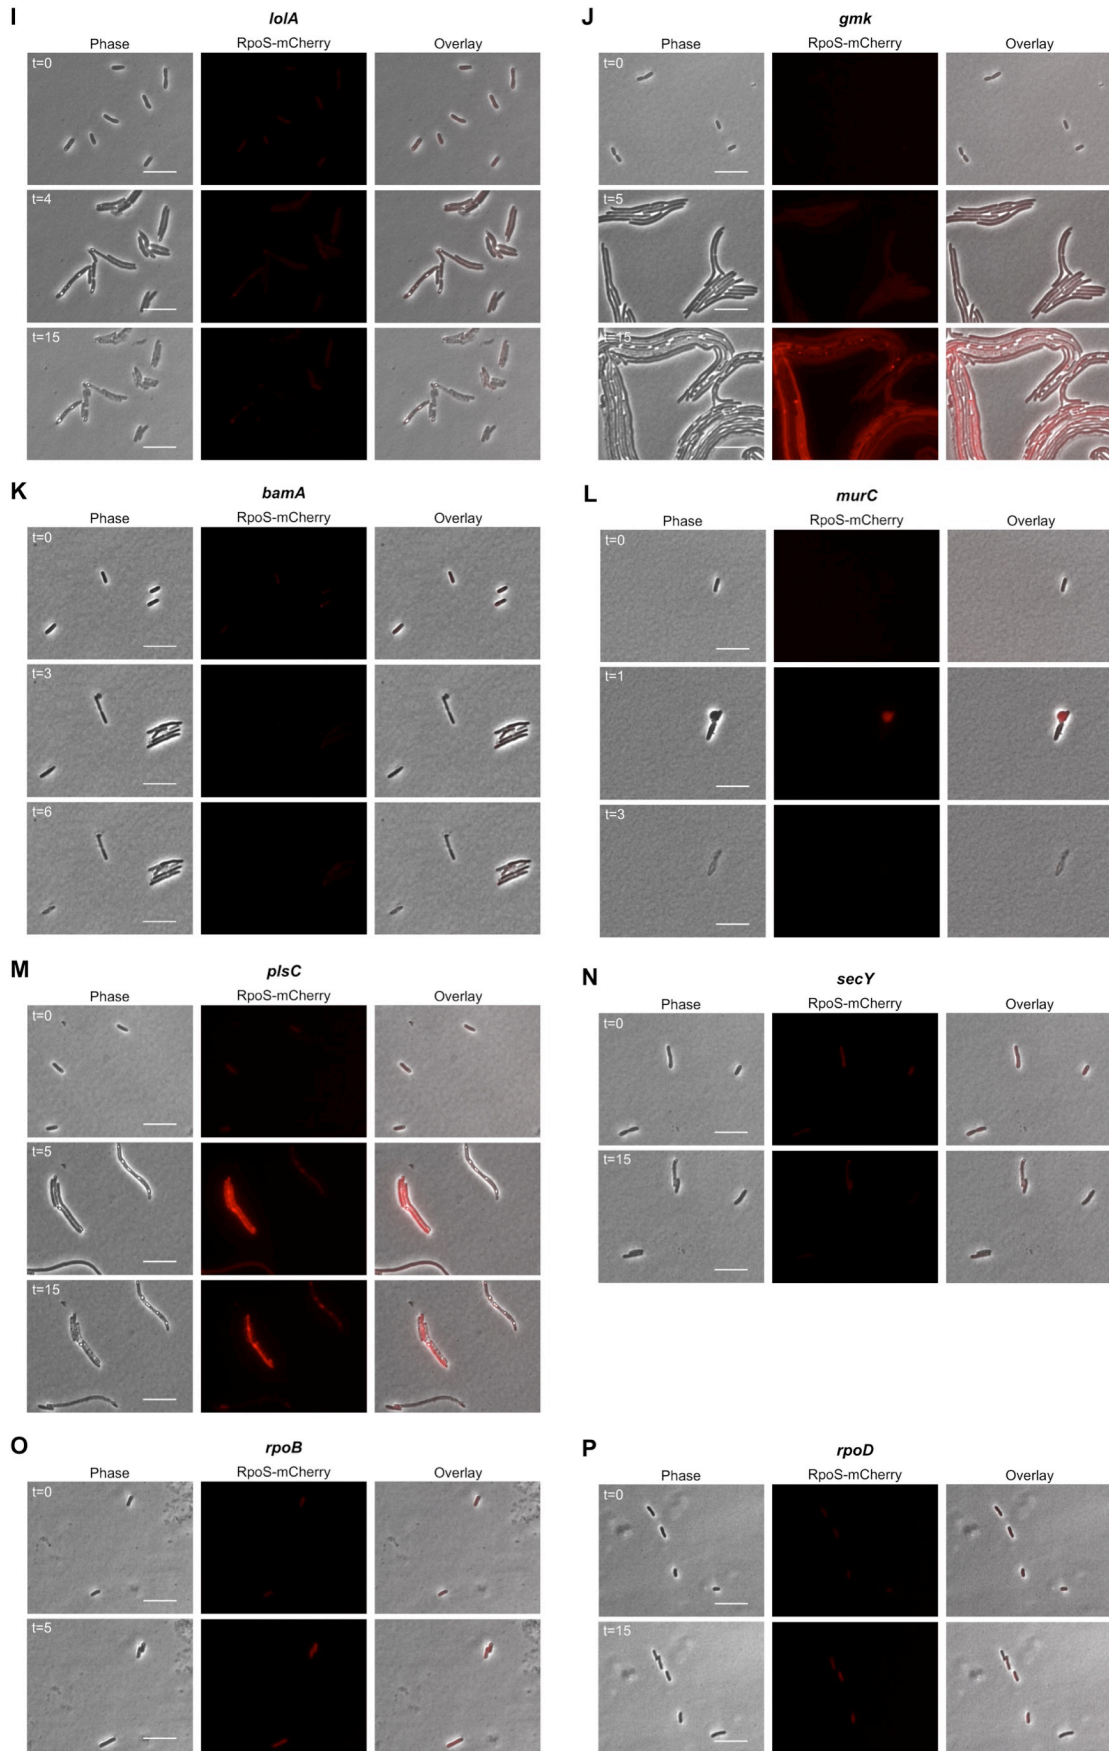

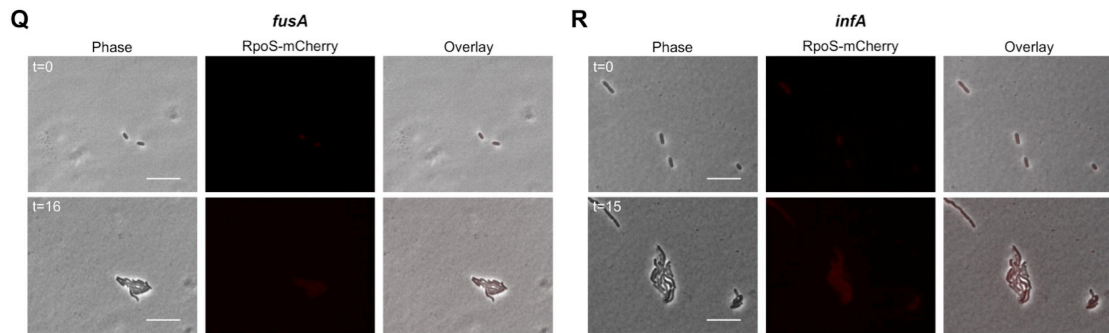

**Figure S2. Time-lapse fluorescence microscopy images during repression of the surveyed genes.** CRISPRi-mediated shut down of expression of the indicated genes in a MG1655-derivate strain harboring the intracellular (p)ppGpp-reporter *rpoS-mCherry*. Phase contrast (left panels), the (p)ppGpp-reporter RpoS-mCherry fluorescence (middle panels) and the merged overlay images (right panels) capturing cells throughout the duration of the experiment. Scale bars = 10  $\mu$ m. The repressed genes are indicated in bold text: **(A) *vals*** **(B) *adk*** **(C) *lptA*** **(D) *lpxA*** **(E) *ftsZ*** **(F) *mreB*** **(G) *dnaB*** **(H) *yihA*** **(I) *lolA*** **(J) *gmk*** **(K) *bamA*** **(L) *murC*** **(M) *plsC*** **(N) *secY*** **(O) *rpoB*** **(P) *rpoD*** **(Q) *fusA***, and **(R) *infA***.

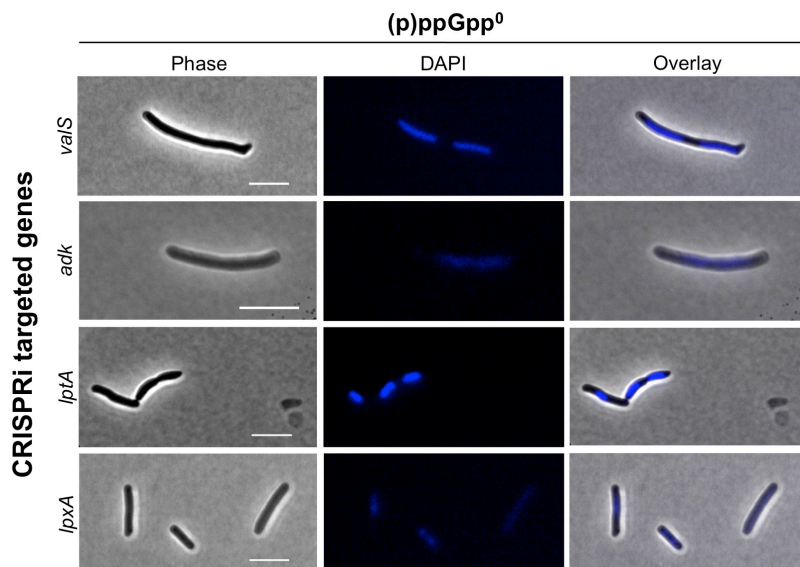

**Figure S3. The nucleoid localizes differently in (p)ppGpp<sup>0</sup> cells during repression of *vals*, *adk*, *lptA* and *lpxA*.** Fluorescence microscopy imaging of DAPI-stained  $\Delta$ *relA*/*spoT* cells 3h post CRISPRi-mediated transcriptional repression of the indicated genes. Phase contrast (left panels), DAPI fluorescence (middle panels) and their merged overlay (right panels) are shown. Scale bars = 10  $\mu$ m.

**Table S1.** The selected cellular processes targeted in this study. The involved genes, corresponding functions, locus tags and the gRNA targeting regions are listed.

| Cellular process                           | Gene        | Function                                                                        | Locus tag | sgRNA N <sub>20</sub> region | Ref |
|--------------------------------------------|-------------|---------------------------------------------------------------------------------|-----------|------------------------------|-----|
| tRNA-charging<br>(positive control)        | <i>valS</i> | Valine-tRNA ligase                                                              | b4258     | gcggetgttogatatcttgt         | 1   |
| Cell division                              | <i>ftsZ</i> | Septal ring protein                                                             | b0095     | cttcaagcagtttgcgttc          | 2   |
| Cytoskeleton                               | <i>mreB</i> | Structural cytoskeletal protein                                                 | b3251     | ttgtccttttacataaatga         | 3   |
| DNA replication                            | <i>dnaB</i> | Replicative DNA helicase                                                        | b4052     | tcagcctgctggtttgtgaa         | 4   |
| Essential GTPases                          | <i>yihA</i> | Function not fully established                                                  | b3865     | gataagctgggtgcgcctg          | 5   |
| Lipoprotein insertion<br>in outer membrane | <i>lola</i> | Outer membrane lipoprotein carrier protein                                      | b0891     | ccgtagcttgcctcaacgaac        | 6   |
| LPS biosynthesis/transport                 | <i>lptA</i> | Periplasmic subunit of the Lpt LPS-transport system                             | b3200     | attaattttgatggtgcct          | 7   |
| LPS biosynthesis/transport                 | <i>lpxA</i> | UDP-N-acetylglucosamine acyltransferase, lipid A biosynthesis pathway           | b0181     | accctcaccaatttogacat         | 8   |
| Nucleotide metabolism                      | <i>adk</i>  | Adenylate kinase                                                                | b0474     | ctgcctgcggaatggtacgc         | 9   |
| Nucleotide metabolism                      | <i>gmK</i>  | Guanylate kinase                                                                | b3648     | ggatttaccgcgcactgg           | 10  |
| Outer membrane protein assembly            | <i>bamA</i> | Essential BAM system component for assembly of proteins in the outer membrane   | b0177     | gcgcaccggcactactgagga        | 11  |
| Peptidoglycan synthesis                    | <i>murC</i> | UDP-N-acetylmuramate—L-alanine ligase, lipid II biosynthesis pathway            | b0091     | tggcatcacgtacgttttcc         | 12  |
| Phospholipid biosynthesis                  | <i>plsC</i> | 1-acylglycerol-3-phosphate O-acyltransferase, phospholipid biosynthesis pathway | b3018     | ccacatgtttcgggttacgc         | 13  |
| Secretion system                           | <i>secY</i> | Sec translocon subunit SecY                                                     | b3300     | gtacagcggcatcaatacca         | 14  |
| Transcription                              | <i>rpoB</i> | RNA polymerase subunit β                                                        | b3987     | taccgctgtagctctgaatc         | 15  |
| Transcription                              | <i>rpoD</i> | Sigma 70, exponential growth sigma factor                                       | b3067     | gaagtttcagctgtgactgc         | 16  |
| Translation                                | <i>fusA</i> | Translation elongation factor G                                                 | b3340     | atgttacggtagcgtgcgat         | 17  |
| Translation                                | <i>infA</i> | Translation initiation factor IF-1                                              | b0884     | attaggaacagtttcaagaa         | 18  |
| Lactose metabolism<br>(negative control)   | <i>lacI</i> | Transcriptional repressor of the <i>lac</i> -operon                             | b0345     | gctggcctggttcaaccacgc        | 19  |

**Table S2.** Strains and plasmids used in this study.

| Strain/plasmid             | Genotype                                            | Source                |
|----------------------------|-----------------------------------------------------|-----------------------|
| Strains                    |                                                     |                       |
| <i>E. coli</i> K-12 MG1655 | Wild-type                                           | Laboratory collection |
| :: <i>rpoS-mCherry</i>     | MG1655 <i>rpoS::mcherry-frt-aphA-frt</i>            | 20                    |
| $\Delta$ <i>relA</i>       | $\Delta$ <i>relA::FRT</i>                           | This study            |
| $\Delta$ <i>relA/spoT</i>  | $\Delta$ <i>relA::FRT/spoT::zeoR</i>                | This study            |
| Plasmids                   |                                                     |                       |
| pdCas9-ssrA                | $P_{tet}$ :: <i>dcas9-ssrA</i>                      | This study            |
| pgRNA-lacI                 | See Table S1 for N <sub>20</sub> matching sequences | This study            |
| pgRNA-valS                 | See Table S1 for N <sub>20</sub> matching sequence  | This study            |
| pgRNA-adk                  | See Table S1 for N <sub>20</sub> matching sequence  | This study            |
| pgRNA-lptA                 | See Table S1 for N <sub>20</sub> matching sequence  | This study            |
| pgRNA-lpxA                 | See Table S1 for N <sub>20</sub> matching sequence  | This study            |
| pgRNA-ftsZ                 | See Table S1 for N <sub>20</sub> matching sequence  | This study            |
| pgRNA-mreB                 | See Table S1 for N <sub>20</sub> matching sequence  | This study            |
| pgRNA-dnaB                 | See Table S1 for N <sub>20</sub> matching sequence  | This study            |
| pgRNA-yihA                 | See Table S1 for N <sub>20</sub> matching sequence  | This study            |
| pgRNA-lolA                 | See Table S1 for N <sub>20</sub> matching sequence  | This study            |
| pgRNA-gmk                  | See Table S1 for N <sub>20</sub> matching sequence  | This study            |
| pgRNA-bamA                 | See Table S1 for N <sub>20</sub> matching sequence  | This study            |
| pgRNA-murC                 | See Table S1 for N <sub>20</sub> matching sequence  | This study            |
| pgRNA-plsC                 | See Table S1 for N <sub>20</sub> matching sequence  | This study            |
| pgRNA-secY                 | See Table S1 for N <sub>20</sub> matching sequence  | This study            |
| pgRNA-rpoB                 | See Table S1 for N <sub>20</sub> matching sequence  | This study            |
| pgRNA-rpoD                 | See Table S1 for N <sub>20</sub> matching sequence  | This study            |
| pgRNA-fusA                 | See Table S1 for N <sub>20</sub> matching sequence  | This study            |
| pgRNA-infA                 | See Table S1 for N <sub>20</sub> matching sequence  | This study            |

## Supplementary References

- 1 Kaplan, S., Atherly, A. G. & Barrett, A. Synthesis of stable RNA in stringent *Escherichia coli* cells in the absence of charged transfer RNA. *Proceedings of the National Academy of Sciences of the United States of America* **70**, 689-692 (1973).
- 2 Romberg, L. & Levin, P. A. Assembly dynamics of the bacterial cell division protein FTSZ: poised at the edge of stability. *Annual review of microbiology* **57**, 125-154, doi:10.1146/annurev.micro.57.012903.074300 (2003).
- 3 Wachi, M. *et al.* Mutant isolation and molecular cloning of *mre* genes, which determine cell shape, sensitivity to mecillinam, and amount of penicillin-binding proteins in *Escherichia coli*. *Journal of bacteriology* **169**, 4935-4940 (1987).

- 4 Kaguni, J. M. *et al.* Initiation of replication of the Escherichia coli chromosomal origin reconstituted  
with purified enzymes. *Basic Life Sci* **30**, 141-150 (1985).
- 5 Dassain, M., Leroy, A., Colosetti, L., Carole, S. & Bouche, J. P. A new essential gene of the 'minimal  
genome' affecting cell division. *Biochimie* **81**, 889-895 (1999).
- 6 Tajima, T., Yokota, N., Matsuyama, S. & Tokuda, H. Genetic analyses of the in vivo function of LolA, a  
periplasmic chaperone involved in the outer membrane localization of Escherichia coli lipoproteins.  
*FEBS Lett* **439**, 51-54 (1998).
- 7 May, J. M., Sherman, D. J., Simpson, B. W., Ruiz, N. & Kahne, D. Lipopolysaccharide transport to the  
cell surface: periplasmic transport and assembly into the outer membrane. *Philos Trans R Soc Lond B  
Biol Sci* **370**, doi:10.1098/rstb.2015.0027 (2015).
- 8 Galloway, S. M. & Raetz, C. R. A mutant of Escherichia coli defective in the first step of endotoxin  
biosynthesis. *The Journal of biological chemistry* **265**, 6394-6402 (1990).
- 9 Glaser, M., Nulty, W. & Vagelos, P. R. Role of adenylate kinase in the regulation of macromolecular  
biosynthesis in a putative mutant of Escherichia coli defective in membrane phospholipid biosynthesis.  
*Journal of bacteriology* **123**, 128-136 (1975).
- 10 Hible, G. *et al.* Calorimetric and crystallographic analysis of the oligomeric structure of Escherichia coli  
GMP kinase. *Journal of molecular biology* **352**, 1044-1059, doi:10.1016/j.jmb.2005.07.042 (2005).
- 11 Wu, S. *et al.* Biofilm-specific extracellular matrix proteins of nontypeable Haemophilus influenzae.  
*Pathogens and disease*, doi:10.1111/2049-632X.12195 (2014).
- 12 El Zoeiby, A., Sanschagrín, F. & Levesque, R. C. Structure and function of the Mur enzymes:  
development of novel inhibitors. *Molecular microbiology* **47**, 1-12 (2003).
- 13 Parsons, J. B. & Rock, C. O. Bacterial lipids: metabolism and membrane homeostasis. *Prog Lipid Res*  
**52**, 249-276, doi:10.1016/j.plipres.2013.02.002 (2013).
- 14 Park, E. *et al.* Structure of the SecY channel during initiation of protein translocation. *Nature* **506**, 102-  
106, doi:10.1038/nature12720 (2014).
- 15 Wang, Y. *et al.* Determinants for Escherichia coli RNA polymerase assembly within the beta subunit.  
*Journal of molecular biology* **270**, 648-662, doi:10.1006/jmbi.1997.1139 (1997).
- 16 Jishage, M., Iwata, A., Ueda, S. & Ishihama, A. Regulation of RNA polymerase sigma subunit synthesis  
in Escherichia coli: intracellular levels of four species of sigma subunit under various growth conditions.  
*Journal of bacteriology* **178**, 5447-5451 (1996).
- 17 Wintermeyer, W., Savelsbergh, A., Semenkov, Y. P., Katunin, V. I. & Rodnina, M. V. Mechanism of  
elongation factor G function in tRNA translocation on the ribosome. *Cold Spring Harb Symp Quant Biol*  
**66**, 449-458 (2001).
- 18 Cummings, H. S. & Hershey, J. W. Translation initiation factor IF1 is essential for cell viability in  
Escherichia coli. *Journal of bacteriology* **176**, 198-205 (1994).
- 19 Lewis, M. The lac repressor. *C R Biol* **328**, 521-548, doi:10.1016/j.crv.2005.04.004 (2005).
- 20 Maisonneuve, E., Castro-Camargo, M. & Gerdes, K. (p)ppGpp controls bacterial persistence by  
stochastic induction of toxin-antitoxin activity. *Cell* **154**, 1140-1150, doi:10.1016/j.cell.2013.07.048  
(2013).
